# Supplementary material for: Anaerobic Co-Digestion of Vinasse and Pentose Liquor and the Role of Micronutrients in Methane Production within Sugarcane Biorefineries
Source: MDPI journal article supplement (doi:10.3390/methane2040029), 2023-12-08
Supplement: s1 [file s1]

Archive with 2 entries (2 files):
- Figure S1.pdf
- Figure S2.pdf
