# Supplementary material for: Anaerobic Co-Digestion of Vinasse and Pentose Liquor and the Role of Micronutrients in Methane Production within Sugarcane Biorefineries
Source: MDPI journal article supplement (doi:10.3390/methane2040029), 2023-12-08
Supplement: s1 [file s1 › Figure S1.pdf]

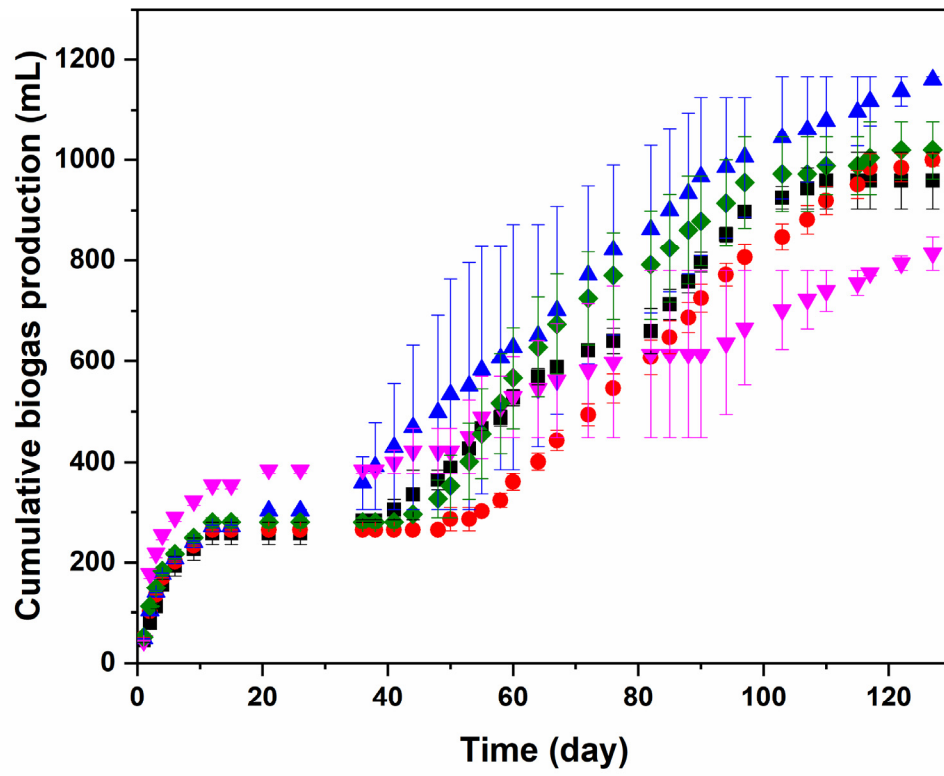

**Figure S1.** Cumulative biogas production and the CH<sub>4</sub> content along the period of BMP tests for ■ microcrystalline cellulose; ● 1G vinasse; ▲ 2G vinasse; ▼ pentoses liquor; ◆ co-substrate.
