# Supplementary figures and images for: Anaerobic Co-Digestion of Vinasse and Pentose Liquor and the Role of Micronutrients in Methane Production within Sugarcane Biorefineries
Source: MDPI journal article supplement (doi:10.3390/methane2040029), 2023-12-08

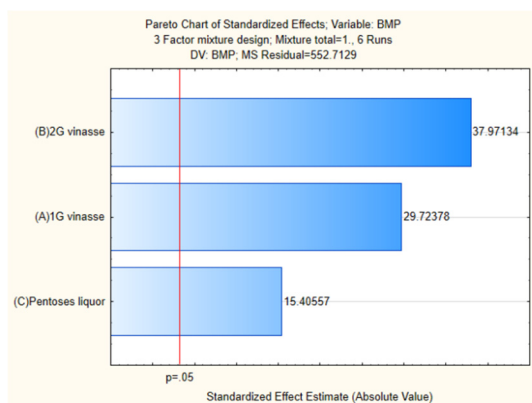

(a)

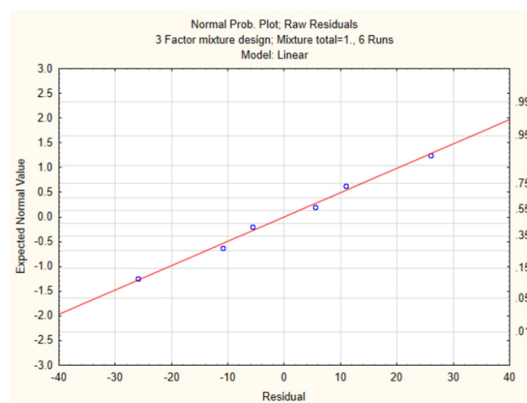

(b)

**Figure S2.** (a) Pareto chart of standardized effects and (b) raw residuals.

Supplement: s1 [file s1 › Figure S2.pdf]
